# Supplementary material for: Opportunities and challenges of a dynamic consent-based application: personalized options for personal health data sharing and utilization
Source: PubMed Central journal article supplement (PMC11365279; doi:10.1186/s12910-024-01091-3), 2024-08-31
Supplement: 12910_2024_1091_MOESM2_ESM.pdf [file 12910_2024_1091_MOESM2_ESM.pdf]

**Additional File 2.** Demographic characteristics of the study participants

| <b>Questionnaire</b>                   | <b>Responses</b> |
|----------------------------------------|------------------|
| <b>Gender, n (%)</b>                   |                  |
| Men                                    | 22 (73.3%)       |
| Women                                  | 8 (26.7%)        |
| <b>Age group, n (%)</b>                |                  |
| 18-30                                  | 8 (26.7%)        |
| 31-40                                  | 15 (50.0%)       |
| 41-50                                  | 3 (10.0%)        |
| Over 50s                               | 4 (13.3%)        |
| <b>Education levels, n (%)</b>         |                  |
| High school                            | 1 (3.3%)         |
| Associate degree                       | 0 (0.0%)         |
| Bachelor's degree                      | 19 (63.3%)       |
| Over master's degree                   | 10 (33.3%)       |
| <b>Chronic disease, n (%)</b>          |                  |
| Yes                                    | 2 (6.7%)         |
| No                                     | 28 (93.3%)       |
| <b>Subjective health status, n (%)</b> |                  |
| Very good                              | 3 (10.0%)        |
| Good                                   | 14 (46.7%)       |
| Normal                                 | 12 (40.0%)       |
| Bad                                    | 1 (3.3%)         |
| Very bad                               | 0 (0.0%)         |
